# Supplementary material for: Estimating the seasonal impact of optically significant water constituents on surface heating rates in the western Baltic Sea
Source: Copernicus journal article supplement (doi:10.5194/bg-20-2743-2023), 2023-07-13
Supplement: Supplementary file 1 [file bg-20-2743-2023-supplement.pdf]

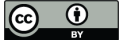

*Supplement of*

## **Estimating the seasonal impact of optically significant water constituents on surface heating rates in the western Baltic Sea**

**Bronwyn E. Cahill et al.**

*Correspondence to:* Bronwyn E. Cahill ([bronwyn.cahill@io-warnemuende.de](mailto:bronwyn.cahill@io-warnemuende.de))

The copyright of individual parts of the supplement might differ from the article licence.

## 1 **In situ and remotely sensed data used for climatologies**

2 In situ measurements and remotely sensed data from the MERIS ocean colour archive of CDOM absorption at 443 nm  
3 were used to develop a climatologies of CDOM absorption which support the evaluation of our modelled estimates of  
4 CDOM absorption. Below, the source and processing of the different data sets are briefly described.

## 5 **In situ CDOM measurements and climatology**

6 A time series (1994 - 2017) of in situ observations of CDOM absorption at 443 nm was reprocessed into seasonal means  
7 for our study area (Figure 2 in article). This data set was collected as a result of the implementation of numerous  
8 research projects and statutory research programs conducted by the Remote Sensing Laboratory at the Institute of  
9 Oceanology, Polish Academy of Sciences (IOPAN), Sopot Poland in the whole Baltic Sea. The main aim of the study on  
10 CDOM optical properties was the assessment of its temporal and spatial variability (Kowalczyk and Kaczmarek, 1996,  
11 Kowalczyk, 1999) and its relation to hydrodynamic conditions and Baltic Sea productivity (Kowalczyk et al., 2006). As  
12 the primary goal of this research was the development and validation of ocean colour remote sensing algorithms  
13 (Kowalczyk et al., 2005a), the vast majority of samples for determination of CDOM absorption spectrum were collected  
14 in the surface layer. However, since 2014, samples were also collected within the water column, depending on the  
15 thermohaline stratification of water masses and depth distribution of autotrophic protists, in order to better resolve the  
16 impact of non-linear processes (i.e. photo-degradation, autochthonous production by phytoplankton, diffusion from  
17 bottom sediments) influencing CDOM optical properties (Kowalczyk et al., 2015). The sampling program is conducted  
18 in the whole Baltic Sea and is designed to resolve the spatial variability of the CDOM absorption coefficient. We use a  
19 subset of this time series located in our study area. Most of the samples were taken in spring and autumn, with a smaller  
20 number of samples collected in winter and summer mostly due to adverse weather conditions or unavailability of  
21 research vessels in summer months. Water samples were collected by Niskin bottle and were filtered first through acid-  
22 washed Whatman glass fibre filters (GF/F, nominal pore size 0.7  $\mu\text{m}$ ). The water was then passed through acid washed  
23 membrane filters with 0.2  $\mu\text{m}$  pore to remove fine-sized particles. From 2014 until the present, water for CDOM  
24 absorption spectra were gravity filtered directly from Niskin bottles through Millipore Opticap XL4 Durapore filter  
25 cartridge with nominal pore size 0.2  $\mu\text{m}$ . Filtered water was kept in acid washed amber glass 200 ml sample bottles  
26 until spectrophotometric analysis, which was performed with use of various models of bench top research grade, double  
27 beam spectrophotometers both in land base laboratory (Kowalczyk and Kaczmarek, 1996; Kowalczyk, 1999) and on the  
28 ship (Kowalczyk et al., 2005a,b, 2006). The cuvette pathlength was 5 or 10 cm depending on the spectrophotometer  
29 model. MilliQ water was used as the reference for all measurements. The absorption coefficient  $a_{CDOM}(\lambda)$  was  
30 calculated as follows:

$$31 \quad a_{CDOM}(\lambda) = \frac{2.303A(\lambda)}{L} \quad (S1)$$

32 where L is the optical path length, A is the absorbance (the flux that has been absorbed) and the factor 2.303 is the  
33 natural logarithm of 10.

34 The whole CDOM absorption data base in the IOPAN repository, collected between 1994 and 2017, was  
35 reprocessed to calculate the spectrum slope coefficient, S. A nonlinear least squares fitting method using a Trust-Region  
36 algorithm implemented in Matlab was applied (Stedmon et al., 2000, Kowalczyk et al., 2006) in the spectral range 300-  
37 600 nm, as follows:

38 
$$a_{CDOM}(\lambda) = a_{CDOM}(\lambda_0) e^{-S(\lambda_0 - \lambda)} + K \quad (S2)$$

39 where  $\lambda_0$  is 350 nm, and K is a background constant that allows for any baseline shift caused by residual  
40 scattering by fine size particle fractions, micro-air bubbles or colloidal material present in the sample, refractive index  
41 differences between sample and the reference, or attenuation not due to CDOM. The parameters  $a_{CDOM}(350)$ , S, and  
42 K were estimated simultaneously via non-linear regression using Eq. (S2).

### 43 **Remotely sensed data**

44 MERIS FRS L2 (full resolution level 2) product from 2003 to 2012 was used to create a monthly climatology of CDOM  
45 absorption for the Western Baltic Sea region. The MERIS FRS L2 product was processed with the C2RCC algorithm  
46 (Doerffer and Schiller, 2007) which has been trained with data-sets from European coastal waters. Full details of the  
47 post processing of the MERIS data into a climatology can be found in Röhrenbach (2019). A monthly climatology for  
48 the complete time frame of the MERIS archive was created and includes the mean value, standard deviation and number  
49 of observations for each point.

50 Figure S1 shows the difference between a snapshot of the MERIS data product (01.04.2004) and the  
51 corresponding April climatology. The snapshot has almost complete data coverage, which is quite rare compared to  
52 other time periods where only a small part of the region of interest is in the frame or free of cloud coverage. The  
53 climatology smooths the spatial variability, providing the average spatial distribution and gradients in CDOM  
54 absorption. High values of  $a_{CDOM}(443)$  can be seen around the river mouths of the Vistula river ( $\approx 1.7 \text{ m}^{-1}$ ) and the  
55 Oder river ( $\approx 0.7 \text{ m}^{-1}$ ), whereas offshore areas show lower values ( $\approx 0.2 \text{ m}^{-1}$ ) and spatial variability. The snapshot image  
56 presents the typical situation at the beginning of the spring freshet. Both Vistula and Oder rivers have similar  
57 hydrographic properties with maximum flow observed in April and May and minimum flow in June and February. The  
58 land use in the catchment is also similar and consists of a mixture of agriculture, forestry and urbanised areas. The  
59 difference in  $a_{CDOM}(443)$  values and the spatial extent of fresh water plumes seen as areas with elevated CDOM  
60 absorption results from the geomorphology of the outlets. The Vistula River has artificial outlets, built in 1895, and this  
61 channel carries up to 90 % of the flow with only a small fraction feeding old deltaic branches, cut off by locks and dikes.  
62 The Oder river outlet is less transformed by human activity, and the Oder River feeds the Szczecin Lagoon which is  
63 connected to the coastal Baltic Sea via three inlets: two located in Poland (Swina and Dziwna) and one in Germany  
64 (Peene). The shallow Szczecin Lagoon acts as a buffer and biogeochemical reactor, where photochemical, microbial and  
65 physical (flocculation) transformation of CDOM may occur leading to effective decreased absorption values recorded  
66 on the marine side of the estuary.  
67

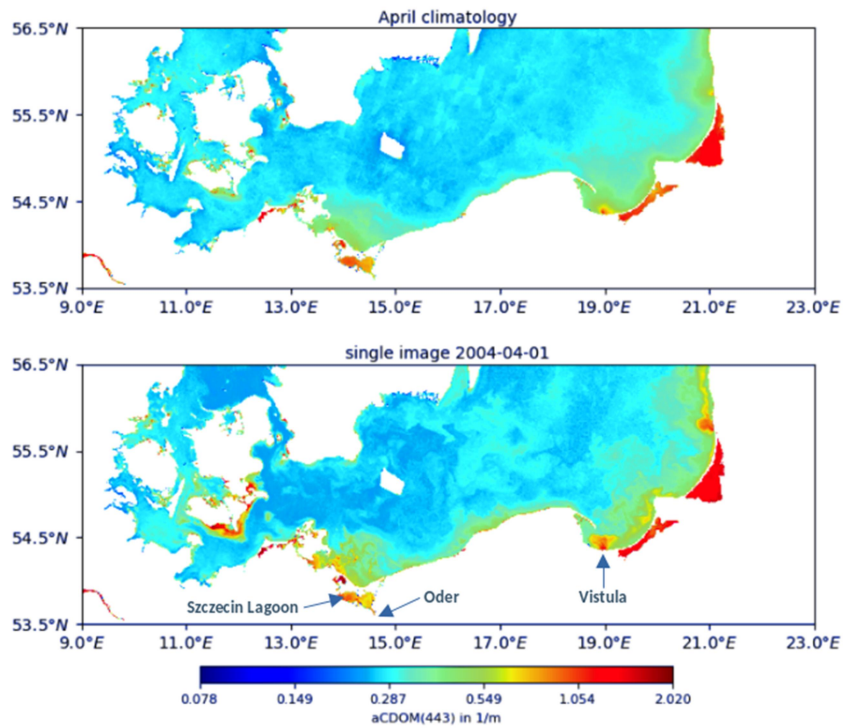

68  
 69  
 70  
 71  
 72  
 73

Figure S1: April climatology (top) and snapshot (01.04.2004) (bottom) of CDOM absorption at 443 nm (adapted from Röhrenbach, 2019).

74 Modelled surface water constituent concentrations in 2018

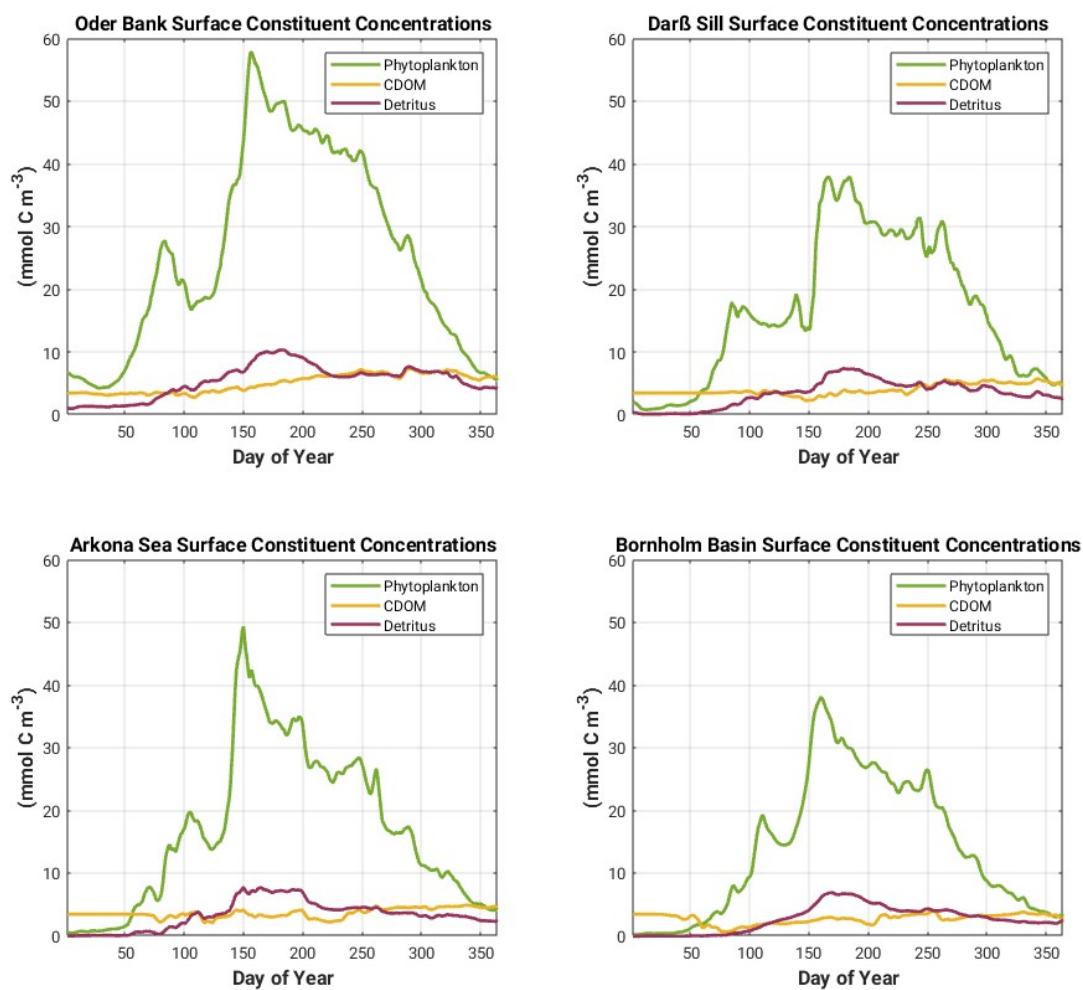

75

76

Figure S2: Modelled surface water constituent concentrations in 2018 at Oder Bank, Darß Sill, Arkona Sea and Bornholm Basin.

77

78

79 Western Baltic Sea monthly mean surface irradiance

80

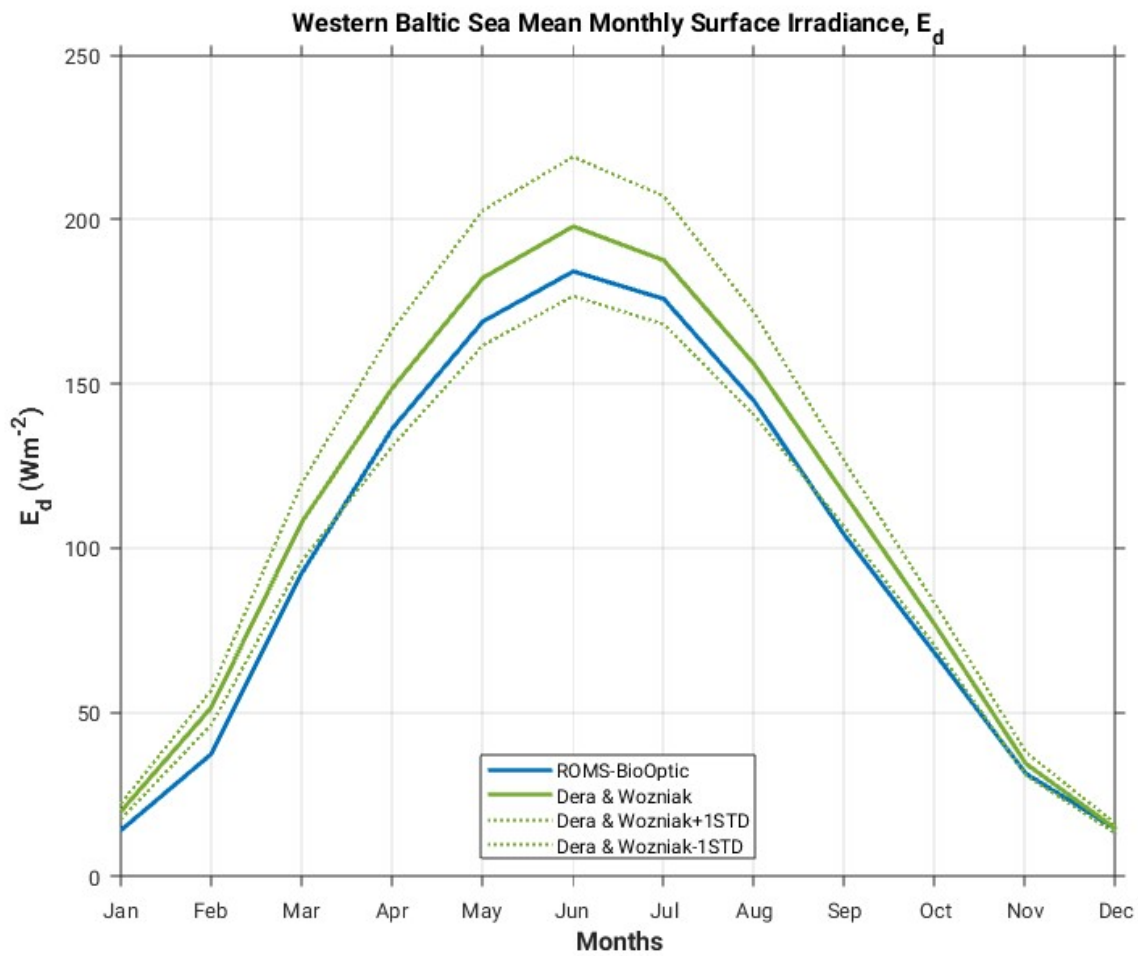

81

82 Figure S3: Modelled monthly mean surface irradiance in the Western Baltic Sea, ROMS-BioOptic versus Dera &  
83 Wozniak, 2010 (Dashed green lines represent Dera & Wozniak +/- one standard deviation).

84

85

86 **Supplementary References**

- 87 Dera, J., and Woźniak, B.: Solar radiation in the Baltic Sea, *Oceanologia*, 52(4), 533–582, 2010.
- 88 Doerffer, R. and Schiller, H.: The MERIS case 2 water algorithm, *International Journal of Remote Sensing*, 28(3-4),  
89 517 – 535, <https://doi.org/10.1080/01431160600821127>, 2007.
- 90 Kowalczyk, P.: Seasonal variability of yellow substance absorption in the surface layer of the Baltic Sea, *Journal of*  
91 *Geophysical Research - Oceans*, 104(C12), 30 047-30 058, 1999.
- 92 Kowalczyk, P. And Kaczmarek, S.: Analysis of temporal and spatial variability of "yellow substance" absorption in the  
93 Southern Baltic, *Oceanologia*, 38(1), 3-32, 1996.
- 94 Kowalczyk, P., Olszewski, J., Darecki, M. and Kaczmarek, S.: Empirical relationships between Coloured Dissolved  
95 Organic Matter (CDOM) absorption and apparent optical properties in Baltic Sea waters, *International Journal of*  
96 *Remote Sensing*, 26(2), 345-370, 2005a.
- 97 Kowalczyk, P., Stoń-Egiert, J., Cooper, W.J., Whitehead, R.F. and Durako, M.J.: Characterization of  
98 Chromophoric Dissolved Organic Matter (CDOM) in the Baltic Sea by Excitation Emission Matrix fluorescence  
99 spectroscopy. *Marine Chemistry*, 96, 273-292, 2005b.
- 100 Kowalczyk P., Stedmon, C.A. and Markager, S.: Modelling absorption by CDOM in the Baltic Sea from season,  
101 salinity and chlorophyll, *Marine Chemistry*, 101, 1-11, 2006.
- 102 Kowalczyk, P., Sagan, S., Zablocka, M. and Borzycka, K.: Mixing anomaly in deoxygenated Baltic Sea deeps indicates  
103 benthic flux and microbial transformation of chromophoric and fluorescent dissolved organic matter, *Estuarine,*  
104 *Coastal and Shelf Science*, 163, 206 – 217, <https://doi.org/10.1016/j.ecss.2015.06.027>, 2015.
- 105 Röhrenbach, J.: Seasonal variability in the absorption of coloured dissolved organic matter (CDOM) in the western and  
106 southern Baltic Sea, Bachelor Thesis, Department of Earth Sciences, Free University Berlin, November 2019.
- 107 Stedmon, C., Markager, S. and Kaas, H.: Optical properties and signatures of chromophoric dissolved organic matter  
108 (CDOM) in Danish coastal waters, *Estuarine, Coastal and Shelf Science*, 51(2), 267 – 278,  
109 <https://doi.org/10.1006/ecss.2000.0645>, 2000.

110
